# Supplementary material for: Losing Dnmt3a dependent methylation in inhibitory neurons impairs neural function by a mechanism impacting Rett syndrome
Source: eLife. 2020 Mar 11;9:e52981. doi: 10.7554/eLife.52981 (PMC7065908; doi:10.7554/eLife.52981)
Supplement: Supplementary file 3. [file elife-52981-supp3.xlsx]

## Sheet: Sheet 1
		Mecp2 cKO vs WT (g1)						Dnmt3a cKO vs WT (g2)
gene_id	gene_name	g1_R2	g1_diff_p	g1_intercept_p	g1_intercept	g1_avg_expr	g1_interceptOverMean	g2_R2	g2_diff_p	g2_intercept_p	g2_intercept	g2_avg_expr	g2_interceptOverMean	g1_deg	g2_deg
ENSMUSG00000000049.11	Apoh	0.373635		0.0545928	140.551	272.93	0.514971	0.894304	0.00202817	0.787497	-65.3217	315.851	-0.206811		yes
ENSMUSG00000002633.4	Shh	0.891492	0.00645332	0.228822	23.6669	103.952	0.227671	0.760267		0.0990785	197.239	119.495	1.6506	yes
ENSMUSG00000005716.16	Pvalb	0.756232	0.0130679	0.543461	113.761	435.807	0.261036	0.156321		0.0296807	731.244	341.476	2.14142	yes
ENSMUSG00000019817.18	Plagl1	0.869729	0.0010893	0.00121329	704.5	682.128	1.0328	0.989967	1.71058e-05	0.293523	107.427	631.267	0.170178		yes
ENSMUSG00000020340.16	Cyfip2	0.987736	2.30222e-05	0.398386	5268.54	47403	0.111144	-0.0548223		0.0112837	35415	43230.9	0.819206	yes
ENSMUSG00000021680.8	Crhbp	0.816909	0.00729095	0.482968	60.0703	244.277	0.245911	0.778469	0.00361521	0.741942	-43.8787	260.202	-0.168633	yes	yes
ENSMUSG00000022861.16	Dgkg	0.982684	4.12569e-05	0.678456	2690.25	17854.2	0.150679	0.599777	0.0252367	0.00994705	16811	16392.5	1.02553	yes
ENSMUSG00000024486.5	Hbegf	0.682161	0.0500828	0.000636828	539.773	270.034	1.9989	0.926941	0.00647733	0.808162	84.5691	329.76	0.256457		yes
ENSMUSG00000025049.5	Taf5	0.84758	0.0226302	0.170699	-393.596	866.547	-0.454212	0.969246	0.000159583	0.058613	-624.069	937.832	-0.665438	yes
ENSMUSG00000025278.8	Flnb	0.914488	0.00122893	0.992462	44.3437	13939.2	0.00318122	0.762648	0.00777078	0.808472	1422.91	13559.2	0.104941	yes	yes
ENSMUSG00000026399.12	Cd55	0.825614	0.00210226	0.136765	286.827	722.043	0.397243	0.932748	0.000495265	0.00982765	470.207	697.37	0.674257	yes
ENSMUSG00000028145.9	Them4	0.747315	0.0117326	0.725918	97.7296	638.909	0.152963	0.664347		0.119601	591.146	751.489	0.786632	yes
ENSMUSG00000031075.18	Ano1	0.607154	0.031359	0.364438	109.62	225.37	0.486399	0.943283	0.000168107	0.00534278	222.664	243.843	0.913144	yes
ENSMUSG00000032010.15	Usp2	0.979661	7.97779e-05	0.476491	745.263	4046.26	0.184186	0.765223	0.0193416	0.00163637	6162.87	4325.64	1.42473	yes
ENSMUSG00000032440.13	Tgfbr2	0.772992	0.00965845	0.585332	158.501	626.905	0.25283	0.25679		0.102431	874.728	491.312	1.78039	yes
ENSMUSG00000034023.16	Fancd2	0.61011	0.0156901	0.0439017	420.758	617.313	0.681596	0.853187	0.00810024	0.120049	242.1	585.909	0.413203		yes
ENSMUSG00000038020.5	Rapgefl1	0.524609	0.032393	0.0635655	2378.52	4211.04	0.564829	0.882051	0.00487205	0.1246	1458.75	3825.57	0.381316		yes
ENSMUSG00000051611.9	Olfr112	0.650478		0.00105348	428.624	157.374	2.72359	0.887264	0.0025748	0.905765	-6.13212	104.017	-0.0589531		yes
ENSMUSG00000054074.9	Skida1	0.486149		0.500807	-102.806	113.977	-0.901986	0.932811	0.00103917	0.668494	-10.2497	71.9371	-0.142481		yes
ENSMUSG00000054196.6	Cthrc1	0.468102		0.823936	25.3171	312.804	0.0809361	0.798365	0.00815216	0.631615	59.868	210.451	0.284474		yes
ENSMUSG00000055435.6	Maf	0.807447	0.0171367	0.52875	-569.469	2061.87	-0.276191	0.311735	0.0758969	0.160474	913.554	1647.69	0.554444	yes
ENSMUSG00000059142.15	Zfp945	0.795911	0.00978434	0.645932	-481.971	1494.16	-0.32257	0.864966	0.00551768	0.00203926	1026.6	1468.74	0.698964	yes
ENSMUSG00000074039.10	4930520O04Rik	0.58063		0.914091	4.92726	146.168	0.0337096	0.649298	0.0120753	0.387199	77.7885	178.923	0.43476		yes
ENSMUSG00000081048.1	Gm11760	0.397012	0.0711382	0.688543	8.63784	44.5317	0.193971	0.917225	0.00175323	0.926694	1.06153	37.3142	0.0284485		yes
ENSMUSG00000085526.1	Gm16083	0.924687	0.000738125	0.752671	-150.312	3286.93	-0.0457302	0.961591	0.000292548	0.0366717	1082.18	3026.43	0.357576	yes
ENSMUSG00000087296.1	Gm12130	0.982082	3.99823e-05	0.420072	30.1903	62.4413	0.483499	-0.159707		0.616848	29.487	40.073	0.735832	yes
ENSMUSG00000087341.4	0610040F04Rik	0.845634	0.00209808	0.00122783	940.01	1043.18	0.901105	0.973568	0.000147094	0.380315	294.852	1046.39	0.281779		yes
ENSMUSG00000087579.7	Hectd2os	0.956142	0.000299877	0.687106	-195.803	1479.26	-0.132366	0.904651		0.415434	-871.982	1415	-0.616243	yes
ENSMUSG00000092292.3	Olfr113	0		1.22263e-07	49.9745	49.9745	1	0.865696	0.00443411	0.636114	-9.26701	31.8356	-0.291089		yes
ENSMUSG00000097365.7	C030034L19Rik	0.750091		0.169106	1260.78	2063.12	0.611103	0.771537	0.00674556	0.587054	-641.419	1909.97	-0.335827		yes
ENSMUSG00000097419.1	Gm26666	0.813474		0.338964	25.5919	33.6029	0.761596	0.844703	0.00145063	0.672982	-7.03552	35.4583	-0.198417		yes
ENSMUSG00000100303.1	2600014E21Rik	0.728846	0.0162714	0.650952	-91.1823	613.409	-0.148649	0.951457	0.000763489	0.35075	-124.021	509.199	-0.243561	yes	yes
ENSMUSG00000111409.1	Rnf26	0.97296	0.000163708	0.267028	1396.82	4343.02	0.321624	0.771838	0.0204813	0.00105828	6581.21	4635.43	1.41976	yes
ENSMUSG00000113586.1	CT025611.1	0.793668	0.00303551	0.4108	88.1054	198.865	0.443041	0.850618	0.00286692	0.326789	105.844	190.093	0.556803	yes
ENSMUSG00000113892.1	CT025611.2	0.722261	0.0064457	0.89937	2.61858	30.6916	0.0853189	0.775391	0.00943397	0.53627	12.0997	30.8845	0.391773	yes	yes
ENSMUSG00000113975.1	AC102435.3	0.76175	0.00439268	0.991162	0.476978	73.551	0.006485	0.931199	0.00359983	0.121146	-248.045	68.5062	-3.62077	yes
ENSMUSG00000114089.1	AC142227.2	0.813704	0.00237725	0.459558	16.1234	61.3276	0.262907	0.83309	0.0106091	0.965527	-1.09937	58.1998	-0.0188896	yes	yes
ENSMUSG00000114833.1	AC091237.1	0.727298	0.0061739	0.386444	31.7727	66.9974	0.474238	0.579654	0.036187	0.199997	54.3125	72.7276	0.746793	yes
